# Supplementary material
Source: PubMed Central journal article supplement (PMC3198313)
Supplement: 1107038108_pnas.201107038SI.pdf [file 1107038108_pnas.201107038SI.pdf]

# Supporting Information

Izuma et al. 10.1073/pnas.1107038108

Table S1. Participant demographic and clinical data

| Parameter                                           | Control ( <i>n</i> = 11; 1 female) |        | ASD ( <i>n</i> = 10; 2 female) |        | <i>P</i> value |
|-----------------------------------------------------|------------------------------------|--------|--------------------------------|--------|----------------|
|                                                     | Mean (SD)                          | Range  | Mean (SD)                      | Range  |                |
| Age                                                 | 30.3 (11.7)                        | 19–57  | 28.80 (10.7)                   | 19–56  | 0.77           |
| Verbal IQ                                           | 112.7 (13.8)                       | 85–134 | 109.8 (17.3)                   | 87–133 | 0.68           |
| Performance IQ                                      | 115.9 (13.1)                       | 88–131 | 111.2 (12.1)                   | 87–125 | 0.41           |
| Full-scale IQ                                       | 116.3 (13.4)                       | 94–136 | 111.7 (14.1)                   | 89–135 | 0.45           |
| ADI-R Social                                        | —                                  | —      | 21.6 (6.7)                     | 12–29  | —              |
| ADI-R Communication                                 | —                                  | —      | 16.6 (4.8)                     | 11–22  | —              |
| ADI-R Stereotypy                                    | —                                  | —      | 6.3 (2.5)                      | 2–10   | —              |
| ADOS Communication                                  | —                                  | —      | 4.1 (1.2)                      | 3–6    | —              |
| ADOS Reciprocal Social Interaction                  | —                                  | —      | 9.0 (3.7)                      | 4–17   | —              |
| ADOS Imagination/Creativity                         | —                                  | —      | 0.9 (0.3)                      | 0–1    | —              |
| ADOS Stereotyped Behaviors and Restricted Interests | —                                  | —      | 1.4 (1.4)                      | 0–3    | —              |
| Empathy quotient                                    | 37.6 (11.9) ( <i>n</i> = 10)       | 16–57  | 24.4 (9.0) ( <i>n</i> = 9)     | 7–37   | 0.02*          |
| Systemizing quotient                                | 71.7 (13.3) ( <i>n</i> = 8)        | 51–92  | 62.1 (24.9) ( <i>n</i> = 8)    | 32–106 | 0.33           |
| Benton Facial Recognition Test                      | 46.9 (4.4) ( <i>n</i> = 10)        | 39–52  | 47.1 (2.3) ( <i>n</i> = 8)     | 43–50  | 0.90           |

ADI was available on only seven of the ASD participants, and additional questionnaires had sample sizes as indicated. *P* values are based on paired *t* tests (two-tailed). \**P* < 0.05. IQ, intelligence quotient; ADI-R, Autism Diagnostic Interview–Revised; ADOS, Autism Diagnostic Observation Schedule.
